# Supplementary material for: Rifaximin Ameliorates Loperamide-Induced Constipation in Rats through the Regulation of Gut Microbiota and Serum Metabolites
Source: MDPI journal article supplement (doi:10.3390/nu15214502), 2023-10-24
Supplement: s1 [file s1]

## **1. Supplementary methods S1**

### **1.1 Sample preparation and extraction**

#### **1.1.1 Liquid samples class I**

The sample stored at -80 °C refrigerator was thawed on ice and vortexed for 10 s. 50 µL of sample and 300 µL of extraction solution (CAN : Methanol = 1:4, V/V) containing internal standards were added into a 2 mL microcentrifuge tube. The sample was vortexed for 3 min and then centrifuged at 12000 rpm for 10 min (4°C). 200 µL of the supernatant was collected and placed in -20 °C for 30 min, and then centrifuged at 12000 rpm for 3 min (4 °C). A 180 µL aliquots of supernatant were transferred for LC-MS analysis.

#### **1.1.2 HPLC Conditions**

All samples were acquired by the LC-MS system followed machine orders. The analytical conditions were as follows, UPLC: column, Waters ACQUITY UPLC BEH C18 1.8 µm × 2.1 mm \* 100 mm; column temperature, 40 °C; flow rate, 0.4 mL/min; injection volume, 2 µL; solvent system, water (0.1 % formic acid): acetonitrile (0.1 % formic acid); The column was eluted with 5 % mobile phase B (0.1 % formic acid in acetonitrile) at 0 minute followed by a linear gradient to 90 % mobile phase B (0.1 % formic acid in acetonitrile) over 11 minutes, held for 1 minute, and then come back to 5 % mobile phase B within 0.1 minute, held for 1.9 minutes, then rapidly return to starting conditions.

#### **1.1.3 MS Conditions (AB)**

The data acquisition was operated using the information-dependent acquisition (IDA) mode using Analyst TF 1.7.1 Software (Sciex, Concord, ON, Canada). The source parameters were set as follows: ion source gas 1 (GAS1), 50 psi; ion source gas 2 (GAS2), 50 psi; curtain gas (CUR), 35 psi; temperature (TEM), 550 °C, or 450 °C; declustering potential (DP), 60 V, or -60 V in positive or negative modes, respectively; and ion spray voltage floating (ISVF), 5000 V or -4000 V in positive or negative modes, respectively. The TOF MS scan parameters were set as follows: mass range, 50–1000 Da; accumulation time, 200 ms; and dynamic background subtract, on. The product ion scan parameters were set as follows: mass range, 25–1000 Da; accumulation time, 40

ms; collision energy, 30 or -30 V in positive or negative modes, respectively; collision energy spread, 15; resolution, UNIT; charge state, 1 to 1; intensity, 100 cps; exclude isotopes within 4 Da; mass tolerance, 50 mDa; maximum number of candidate ions to monitor per cycle, 12.

## 1.2 Analytical methods

The original data file acquired by LC-MS was converted into mzML format by ProteoWizard software. Peak extraction, peak alignment and retention time correction were respectively performed by XCMS program. The “SVR” method was used to correct the peak area. The peaks with detection rate lower than 50 % in each group of samples were discarded. After that, metabolic identification information was obtained by searching the laboratory’s self-built database, integrated public database, AI database and metDNA.

### 1. 2.1 PCA

Unsupervised PCA (principal component analysis) was performed by statistics function `prcomp` within R ([www.r-project.org](http://www.r-project.org)). The data was unit variance scaled before unsupervised PCA.

### 1. 2.2 Hierarchical Cluster Analysis and Pearson Correlation Coefficients

The HCA (hierarchical cluster analysis) results of samples and metabolites were presented as heatmaps with dendrograms, while pearson correlation coefficients (PCC) between samples were calculated by the `cor` function in R and presented as only heatmaps. Both HCA and PCC were carried out by R package `ComplexHeatmap`. For HCA, normalized signal intensities of metabolites (unit variance scaling) are visualized as a color spectrum.

### 1. 2.3 Differential metabolites selected

For two-group analysis, differential metabolites were determined by VIP ( $VIP > 1$ ) and P-value ( $P\text{-value} < 0.05$ , Student’s *t* test). For multi-group analysis, differential metabolites were determined by VIP ( $VIP > 1$ ) and P-value ( $P\text{-value} < 0.05$ , ANOVA). VIP values were extracted from OPLS-DA result, which also contain score plots and permutation plots, was generated using R package `MetaboAnalystR`. The data was log transform

(log2) and mean centering before OPLS-DA. In order to avoid overfitting, a permutation test (200 permutations) was performed.

#### 1. 2.4 KEGG annotation and enrichment analysis

Identified metabolites were annotated using KEGG Compound database (<http://www.kegg.jp/kegg/compound/>), annotated metabolites were then mapped to KEGG Pathway database (<http://www.kegg.jp/kegg/pathway.html>). Significantly enriched pathways are identified with a hypergeometric test's P-value for a given list of metabolites.

2. **Table S1.** The altered microbial communities in genus levels between the LOP and RIF groups.

| Species Name                              | LOP Mean<br>(%) | LOP SD<br>(%) | RIF Mean<br>(%) | RIF SD<br>(%) | <i>p</i> Value |
|-------------------------------------------|-----------------|---------------|-----------------|---------------|----------------|
| g__Akkermansia                            | 1.488           | 1.575         | 10.960          | 9.146         | 0.030          |
| g__Romboutsia                             | 7.953           | 3.807         | 3.675           | 3.177         | 0.030          |
| g__Dubosiella                             | 8.098           | 6.152         | 0.027           | 0.046         | 0.002          |
| g__Clostridium_sensu_stricto_1            | 4.896           | 2.215         | 0.002           | 0.002         | 0.002          |
| g__Allobaculum                            | 4.336           | 6.860         | 0.002           | 0.006         | 0.034          |
| g__Bifidobacterium                        | 4.267           | 2.059         | 0.016           | 0.019         | 0.002          |
| g__norank_f__norank_o__Clostridia_UCG-014 | 3.832           | 2.150         | 0.003           | 0.003         | 0.002          |
| g__Coriobacteriaceae_UCG-002              | 2.517           | 2.105         | 0.002           | 0.002         | 0.002          |
| g__Faecalibaculum                         | 2.090           | 1.297         | 0.363           | 0.698         | 0.015          |
| g__Ruminococcus_gauvreauii_group          | 0.001           | 0.003         | 2.198           | 1.971         | 0.002          |
| g__Blautia                                | 0.016           | 0.018         | 1.672           | 2.613         | 0.005          |
| g__Lachnoclostridium                      | 0.032           | 0.021         | 0.632           | 0.877         | 0.007          |
| g__Candidatus_Saccharimonas               | 0.498           | 0.349         | 0.083           | 0.105         | 0.015          |
| g__unclassified_f__Ruminococcaceae        | 0.344           | 0.079         | 0.222           | 0.110         | 0.041          |
| g__Parasutterella                         | 0.485           | 0.723         | 0.022           | 0.023         | 0.007          |
| g__Erysipelotrichaceae_UCG-003            | 0.000           | 0.001         | 0.369           | 0.392         | 0.001          |
| g__Eubacterium_ruminantium_group          | 0.083           | 0.100         | 0.227           | 0.599         | 0.024          |
| g__Alistipes                              | 0.241           | 0.165         | 0.064           | 0.038         | 0.015          |
| g__unclassified_c__Bacilli                | 0.197           | 0.066         | 0.034           | 0.036         | 0.002          |
| g__Erysipelatoclostridium                 | 0.003           | 0.003         | 0.218           | 0.211         | 0.007          |
| g__unclassified_k__norank_d__Bacteria     | 0.134           | 0.104         | 0.042           | 0.038         | 0.041          |
| g__Gordonibacter                          | 0.012           | 0.013         | 0.153           | 0.121         | 0.006          |
| g__norank_f__Erysipelatoclostridiaceae    | 0.000           | 0.000         | 0.106           | 0.172         | 0.004          |
| g__Clostridium_innocuum_group             | 0.000           | 0.000         | 0.106           | 0.262         | 0.011          |
| g__Eubacterium_nodatum_group              | 0.011           | 0.013         | 0.094           | 0.064         | 0.025          |

|                                             |       |       |       |       |       |
|---------------------------------------------|-------|-------|-------|-------|-------|
| g__Lachnospira                              | 0.092 | 0.082 | 0.000 | 0.000 | 0.004 |
| g__Rothia                                   | 0.002 | 0.002 | 0.071 | 0.099 | 0.037 |
| g__Eubacterium_brachy_group                 | 0.050 | 0.051 | 0.000 | 0.000 | 0.001 |
| g__norank_f__Christensenellaceae            | 0.043 | 0.023 | 0.005 | 0.008 | 0.005 |
| g__Anaerofustis                             | 0.000 | 0.001 | 0.040 | 0.044 | 0.002 |
| g__Achromobacter                            | 0.028 | 0.008 | 0.003 | 0.005 | 0.002 |
| g__norank_f__norank_o__norank_c__Clostridia | 0.029 | 0.009 | 0.000 | 0.000 | 0.001 |
| g__Tuzzerella                               | 0.018 | 0.026 | 0.008 | 0.022 | 0.040 |
| g__Ruminiclostridium                        | 0.022 | 0.016 | 0.003 | 0.006 | 0.006 |
| g__unclassified_o__Coriobacteriales         | 0.024 | 0.023 | 0.000 | 0.000 | 0.004 |
| g__unclassified_f__Erysipelotrichaceae      | 0.022 | 0.016 | 0.000 | 0.001 | 0.006 |
| g__Globicatella                             | 0.000 | 0.000 | 0.016 | 0.025 | 0.031 |
| g__A2                                       | 0.001 | 0.002 | 0.014 | 0.018 | 0.047 |
| g__Pygmaibacter                             | 0.009 | 0.005 | 0.002 | 0.003 | 0.009 |
| g__Peptococcus                              | 0.011 | 0.013 | 0.000 | 0.000 | 0.001 |
| g__Rikenella                                | 0.008 | 0.006 | 0.001 | 0.002 | 0.005 |
| g__Eisenbergiella                           | 0.009 | 0.010 | 0.000 | 0.000 | 0.004 |
| g__Exiguobacterium                          | 0.006 | 0.007 | 0.000 | 0.000 | 0.011 |
| g__Plesiomonas                              | 0.000 | 0.001 | 0.005 | 0.005 | 0.038 |
| g__Pediococcus                              | 0.005 | 0.005 | 0.000 | 0.000 | 0.011 |
| g__norank_f__Sutterellaceae                 | 0.004 | 0.002 | 0.000 | 0.000 | 0.003 |
| g__Ideonella                                | 0.003 | 0.004 | 0.000 | 0.000 | 0.030 |
| g__Christensenella                          | 0.002 | 0.002 | 0.000 | 0.000 | 0.028 |
| g__Crenobacter                              | 0.002 | 0.002 | 0.000 | 0.000 | 0.028 |
| g__Bradyrhizobium                           | 0.000 | 0.000 | 0.002 | 0.002 | 0.028 |

---

3. **Table S2.** The altered microbial communities in specials levels between the LOP and RIF groups.

| Species Name                                           | LOP Mean | LOP SD | RIF Mean | RIF SD | p Value |
|--------------------------------------------------------|----------|--------|----------|--------|---------|
|                                                        | (%)      | (%)    | (%)      | (%)    |         |
| s__Akkermansia_muciniphila                             | 1.483    | 1.568  | 10.930   | 9.118  | 0.030   |
| s__Romboutsia_ilealis                                  | 7.914    | 3.804  | 3.628    | 3.119  | 0.030   |
| s__Lactobacillus_murinus                               | 1.422    | 1.542  | 7.769    | 5.963  | 0.015   |
| s__uncultured_bacterium_g__Dubosiella                  | 8.093    | 6.145  | 0.027    | 0.046  | 0.002   |
| s__uncultured_bacterium_g__Clostridium_sensu_stricto_1 | 4.862    | 2.215  | 0.001    | 0.003  | 0.002   |
| s__Bifidobacterium_pseudolongum                        | 4.238    | 2.041  | 0.012    | 0.016  | 0.002   |
| s__unclassified_g__norank_f__norank_o__Clostridia_U    | 2.765    | 1.048  | 0.002    | 0.003  | 0.002   |
| CG-014                                                 |          |        |          |        |         |
| s__uncultured_bacterium_g__Coriobacteriaceae_UCG-002   | 2.517    | 2.105  | 0.002    | 0.002  | 0.002   |
| s__Faecalibaculum_rodentium                            | 2.081    | 1.288  | 0.363    | 0.698  | 0.015   |
| s__uncultured_organism_g__Ruminococcus_gauvreauii__    | 0.001    | 0.002  | 2.190    | 1.966  | 0.002   |
| group                                                  |          |        |          |        |         |
| s__uncultured_bacterium_g__Blautia                     | 0.008    | 0.016  | 0.927    | 1.109  | 0.013   |
| s__uncultured_bacterium_g__norank_f__norank_o__Clo     | 0.925    | 1.162  | 0.000    | 0.001  | 0.001   |
| stridia_UCG-014                                        |          |        |          |        |         |
| s__gut_metagenome_g__Lactobacillus                     | 0.158    | 0.149  | 0.607    | 0.533  | 0.021   |
| s__unclassified_g__Blautia                             | 0.007    | 0.004  | 0.745    | 1.562  | 0.002   |
| s__unclassified_g__Lachnoclostridium                   | 0.027    | 0.015  | 0.629    | 0.879  | 0.007   |
| s__uncultured_bacterium_g__Candidatus_Saccharimonas    | 0.497    | 0.348  | 0.081    | 0.101  | 0.015   |
| s__unclassified_f__Ruminococcaceae                     | 0.344    | 0.079  | 0.222    | 0.110  | 0.041   |
| s__uncultured_bacterium_g__Parasutterella              | 0.479    | 0.710  | 0.022    | 0.023  | 0.007   |
| s__uncultured_bacterium_g__Erysipelotrichaceae_UCG-003 | 0.000    | 0.000  | 0.368    | 0.392  | 0.001   |
| s__uncultured_bacterium_g__Eubacterium_ruminantium     | 0.083    | 0.100  | 0.227    | 0.599  | 0.024   |
| _group                                                 |          |        |          |        |         |
| s__unclassified_c__Bacilli                             | 0.197    | 0.066  | 0.034    | 0.036  | 0.002   |

|                                                          |       |       |       |       |       |
|----------------------------------------------------------|-------|-------|-------|-------|-------|
| s__uncultured_bacterium_g__Lactobacillus                 | 0.041 | 0.041 | 0.178 | 0.149 | 0.030 |
| s__unclassified_g__Alistipes                             | 0.161 | 0.139 | 0.037 | 0.025 | 0.025 |
| s__unclassified_k__norank_d__Bacteria                    | 0.134 | 0.104 | 0.042 | 0.038 | 0.041 |
| s__uncultured_bacterium_g__Gordonibacter                 | 0.012 | 0.013 | 0.153 | 0.121 | 0.006 |
| s__uncultured_bacterium_g__Erysipelatoclostridium        | 0.000 | 0.000 | 0.131 | 0.166 | 0.011 |
| s__uncultured_bacterium_g__Desulfovibrio                 | 0.111 | 0.109 | 0.019 | 0.024 | 0.035 |
| s__unclassified_g__Enterorhabdus                         | 0.023 | 0.012 | 0.100 | 0.086 | 0.040 |
| s__unclassified_g__Christensenellaceae_R-7_group         | 0.105 | 0.052 | 0.007 | 0.010 | 0.002 |
| s__uncultured_bacterium_g__norank_f__Erysipelatoclos     | 0.000 | 0.000 | 0.106 | 0.172 | 0.004 |
| tridiaceae                                               |       |       |       |       |       |
| s__uncultured_bacterium_g__Eubacterium_nodatum_group     | 0.011 | 0.013 | 0.094 | 0.064 | 0.025 |
| s__uncultured_bacterium_g__Clostridium_innocuum_group    | 0.000 | 0.000 | 0.104 | 0.258 | 0.011 |
| s__uncultured_rumen_bacterium_g__norank_f__norank_       | 0.095 | 0.119 | 0.000 | 0.000 | 0.001 |
| o__Clostridia_UCG-014                                    |       |       |       |       |       |
| s__unclassified_g__Lachnospira                           | 0.092 | 0.082 | 0.000 | 0.000 | 0.004 |
| s__unclassified_g__Rothia                                | 0.002 | 0.002 | 0.071 | 0.099 | 0.037 |
| s__uncultured_bacterium_g__Alistipes                     | 0.056 | 0.047 | 0.003 | 0.005 | 0.002 |
| s__uncultured_bacterium_g__norank_f__Erysipelotrichaceae | 0.012 | 0.013 | 0.047 | 0.037 | 0.034 |
| s__unclassified_g__Erysipelatoclostridium                | 0.002 | 0.002 | 0.050 | 0.072 | 0.006 |
| s__uncultured_bacterium_g__Faecalitalea                  | 0.000 | 0.000 | 0.051 | 0.110 | 0.031 |
| s__uncultured_bacterium_g__Eubacterium_brachy_group      | 0.047 | 0.049 | 0.000 | 0.000 | 0.001 |
| s__uncultured_Clostridiales_bacterium_g__norank_f__n     | 0.046 | 0.047 | 0.000 | 0.001 | 0.006 |
| orank_o__Clostridia_UCG-014                              |       |       |       |       |       |
| s__uncultured_bacterium_g__norank_f__Christensenellaceae | 0.040 | 0.022 | 0.005 | 0.008 | 0.005 |
| s__Anaerofustis_stercorihominis_DSM_17244                | 0.000 | 0.001 | 0.040 | 0.044 | 0.002 |
| s__Lachnospiraceae_bacterium_COE1                        | 0.000 | 0.000 | 0.040 | 0.095 | 0.030 |
| s__uncultured_Clostridiales_bacterium_g__Monoglobus      | 0.037 | 0.027 | 0.000 | 0.000 | 0.001 |
| s__unclassified_g__Clostridium_sensu_stricto_1           | 0.032 | 0.018 | 0.000 | 0.001 | 0.001 |
| s__unclassified_g__Achromobacter                         | 0.028 | 0.008 | 0.003 | 0.005 | 0.002 |

|                                                                                |       |       |       |       |       |
|--------------------------------------------------------------------------------|-------|-------|-------|-------|-------|
| s__Alistipes_sp._cv1                                                           | 0.020 | 0.016 | 0.009 | 0.011 | 0.046 |
| s__uncultured_bacterium_g__Tuzzerella                                          | 0.018 | 0.026 | 0.008 | 0.022 | 0.040 |
| s__uncultured_organism_g__Ruminiclostridium                                    | 0.022 | 0.016 | 0.003 | 0.006 | 0.006 |
| s__unclassified_o__Coriobacteriales                                            | 0.024 | 0.023 | 0.000 | 0.000 | 0.004 |
| s__unclassified_f__Erysipelotrichaceae                                         | 0.022 | 0.016 | 0.000 | 0.001 | 0.006 |
| s__unclassified_g__Bifidobacterium                                             | 0.020 | 0.020 | 0.000 | 0.000 | 0.001 |
| s__uncultured_bacterium_g__norank_f__norank_o__norank_c__Clostridia            | 0.020 | 0.007 | 0.000 | 0.000 | 0.001 |
| s__uncultured_organism_g__Defluviitaleaceae_UCG-011                            | 0.001 | 0.004 | 0.019 | 0.021 | 0.009 |
| s__uncultured_bacterium_g__norank_f__UCG-010                                   | 0.017 | 0.014 | 0.002 | 0.003 | 0.019 |
| s__uncultured_Allobaculum_sp._g__Allobaculum                                   | 0.019 | 0.034 | 0.000 | 0.000 | 0.011 |
| s__unclassified_g__Globicatella                                                | 0.000 | 0.000 | 0.016 | 0.025 | 0.031 |
| s__uncultured_bacterium_g__Ruminococcus                                        | 0.001 | 0.002 | 0.014 | 0.027 | 0.046 |
| s__uncultured_Desulfovibrionales_bacterium_g__norank_f__Desulfovibrionaceae    | 0.015 | 0.012 | 0.000 | 0.000 | 0.003 |
| s__uncultured_bacterium_g__A2                                                  | 0.001 | 0.002 | 0.014 | 0.018 | 0.047 |
| s__uncultured_rumen_bacterium_g__Christensenellaceae_R-7_group                 | 0.011 | 0.008 | 0.001 | 0.002 | 0.011 |
| s__uncultured_bacterium_g__Pygmaibacter                                        | 0.009 | 0.005 | 0.002 | 0.003 | 0.009 |
| s__uncultured_bacterium_g__Peptococcus                                         | 0.011 | 0.013 | 0.000 | 0.000 | 0.001 |
| s__uncultured_Clostridium_sp._g__norank_f__Eubacterium_coprostanoligenes_group | 0.009 | 0.010 | 0.001 | 0.004 | 0.046 |
| s__uncultured_prokaryote_g__Christensenellaceae_R-7_group                      | 0.010 | 0.007 | 0.000 | 0.001 | 0.006 |
| s__Clostridium_leptum_g__norank                                                | 0.008 | 0.009 | 0.001 | 0.002 | 0.048 |
| s__uncultured_bacterium_g__Rikenella                                           | 0.008 | 0.006 | 0.000 | 0.001 | 0.002 |
| s__uncultured_bacterium_g__Eisenbergiella                                      | 0.009 | 0.010 | 0.000 | 0.000 | 0.004 |
| s__uncultured_organism_g__norank_f__norank_o__norank_c__Clostridia             | 0.009 | 0.006 | 0.000 | 0.000 | 0.001 |



|                                                       |       |       |       |       |       |
|-------------------------------------------------------|-------|-------|-------|-------|-------|
| s__Exiguobacterium_sp._AT1b                           | 0.006 | 0.007 | 0.000 | 0.000 | 0.011 |
| s__Pediococcus_pentosaceus_g__Pediococcus             | 0.005 | 0.005 | 0.000 | 0.000 | 0.011 |
| s__Plesiomonas_shigelloides                           | 0.000 | 0.001 | 0.005 | 0.005 | 0.038 |
| s__uncultured_bacterium_g__Monoglobus                 | 0.005 | 0.005 | 0.000 | 0.000 | 0.030 |
| s__Christensenella_sp._Marseille-P2437                | 0.004 | 0.006 | 0.000 | 0.000 | 0.030 |
| s__uncultured_Clostridium_sp._g__Christensenellaceae_ | 0.004 | 0.005 | 0.000 | 0.000 | 0.030 |
| R-7_group                                             |       |       |       |       |       |
| s__unclassified_g__Eubacterium_brachy_group           | 0.003 | 0.003 | 0.000 | 0.000 | 0.030 |
| s__uncultured_bacterium_g__Ideonella                  | 0.003 | 0.004 | 0.000 | 0.000 | 0.030 |
| s__Bacteroides_paurosaccharolyticus                   | 0.000 | 0.000 | 0.003 | 0.003 | 0.030 |
| s__Bradyrhizobium_elkanii_g__Bradyrhizobium           | 0.000 | 0.000 | 0.002 | 0.002 | 0.028 |
| s__unclassified_g__Crenobacter                        | 0.002 | 0.002 | 0.000 | 0.000 | 0.028 |
| s__Christensenella_minuta                             | 0.002 | 0.002 | 0.000 | 0.000 | 0.028 |

---

4. **Table S3.** The differential metabolites in the primary bile acid biosynthesis, bile secretion, steroid hormone biosynthesis and steroid biosynthesis metabolic pathways between the three groups.

| Name                                     | Quantitative analysis |           | Quantitative analysis |           | Quantitative analysis |           | CTR vs LOP | CTR vs LOP    | LOP vs RIF | LOP vs RIF    |
|------------------------------------------|-----------------------|-----------|-----------------------|-----------|-----------------------|-----------|------------|---------------|------------|---------------|
|                                          | (CTR)                 |           | (LOP)                 |           | (RIF)                 |           | P-value    | change in LOP | P-value    | change in RIF |
|                                          | Mean                  | SD        | Mean                  | SD        | Mean                  | SD        |            |               |            |               |
| 7alpha,26-Dihydroxycholest-4-en-3-one    | 3808.500              | 4365.786  | 97483.333             | 41973.202 | 4435.000              | 3347.296  | 0.001      | up            | 0.001      | down          |
| Glycochenodeoxycholic acid               | 264.667               | 117.437   | 4208.333              | 1333.798  | 482.083               | 514.599   | 0.003      | up            | 0.003      | down          |
| Chenodeoxycholic acid                    | 782.000               | 533.211   | 97038.333             | 62634.023 | 2994.500              | 2779.676  | 0.013      | up            | 0.014      | down          |
| 7alpha-Hydroxy-3-oxo-4-cholestenoic acid | 2105.000              | 689.398   | 43878.333             | 21570.295 | 2515.000              | 2315.908  | 0.005      | up            | 0.005      | down          |
| 3,7-Dihydroxycoprostanic acid            | 227.147               | 230.767   | 8808.000              | 5665.365  | 305.533               | 201.131   | 0.014      | up            | 0.014      | down          |
| Taurochenodeoxycholic acid               | 34216.667             | 29312.620 | 141716.667            | 77327.367 | 85050.000             | 29998.050 | 0.017      | up            | -          | -             |
| Taurocholic acid                         | 13228.333             | 10924.267 | 14276.667             | 5588.090  | 34200.000             | 15746.492 | -          | -             | 0.025      | up            |
| Deoxycholic acid                         | 1065.333              | 541.481   | 50633.333             | 36980.517 | 1424.000              | 649.855   | 0.022      | up            | 0.022      | down          |
| Thyroxine                                | 2978.333              | 366.574   | 1603.667              | 783.886   | 3090.000              | 445.062   | 0.006      | down          | 0.004      | up            |
| leukotriene C4                           | 2461.667              | 634.741   | 3601.667              | 817.323   | 2653.333              | 473.315   | 0.023      | up            | 0.039      | down          |

|                             |           |           |           |           |           |          |       |      |       |      |
|-----------------------------|-----------|-----------|-----------|-----------|-----------|----------|-------|------|-------|------|
| Lithocholic acid            | 30.400    | 18.505    | 1183.400  | 1078.320  | 24.657    | 25.800   | 0.047 | up   | 0.046 | down |
| L-Carnitine                 | 6421.667  | 2348.509  | 3373.667  | 2285.975  | 3631.667  | 1076.465 | 0.046 | down | -     | -    |
| Carnitine                   | 61616.667 | 12332.626 | 39633.333 | 17472.912 | 55666.667 | 7452.427 | 0.033 | down | -     | -    |
| Liothyronine                | 13793.333 | 4782.747  | 6919.833  | 4010.432  | 10285.000 | 5748.620 | 0.023 | down | -     | -    |
| Tetracycline                | 2861.667  | 892.579   | 1371.883  | 972.934   | 1948.333  | 372.796  | 0.020 | down | -     | -    |
| Vitamin D3                  | 20.868    | 13.971    | 590.700   | 418.798   | 29.290    | 17.925   | 0.019 | up   | 0.048 | down |
| Calcitriol                  | 38.250    | 12.170    | 764.817   | 549.941   | 80.400    | 73.147   | 0.017 | up   | 0.017 | down |
| Zymosterol                  | 5.133     | 3.578     | 519.188   | 414.474   | 14.023    | 17.465   | 0.010 | up   | 0.012 | down |
| Androstanedione             | 6.383     | 7.481     | 377.167   | 184.969   | 17.028    | 22.069   | 0.021 | up   | 0.022 | down |
| Tetrahydrocortisol          | 7.335     | 5.168     | 446.017   | 309.044   | 7.327     | 5.140    | 0.023 | up   | 0.028 | down |
| Androstanolone              | 2855.833  | 1783.111  | 87.633    | 50.965    | 3411.500  | 2827.818 | 0.029 | up   | 0.031 | down |
| Testosterone glucuronide    | 11726.833 | 7244.799  | 1746.333  | 2289.250  | 8829.000  | 6478.687 | 0.004 | up   | 0.005 | down |
| 5beta-Dihydrocorticosterone | 192.292   | 6.000     | 1668.691  | 6.000     | 564.557   | 6.000    | 0.018 | up   | 0.018 | down |
| Estrone                     | 37.793    | 6.000     | 2713.867  | 6.000     | 48.626    | 6.000    | 0.013 | down | 0.035 | up   |
| Estrone glucuronide         | 4.019     | 6.000     | 638.390   | 6.000     | 33.837    | 6.000    | 0.018 | down | -     | -    |

---
